# Supplementary material for: Nickel polyelectrolytes as hole transporting materials for organic and perovskite solar cell applications
Source: Royal Society of Chemistry journal article supplement (doi:10.1039/d4ya00081a), 2024-01-01
Supplement: d4ya00081a1.pdf [file d4ya00081a1.pdf]

## Supporting Information

### Nickel Polyelectrolytes as Hole Transporting Materials for Organic and Perovskite Solar Cell Applications

Jin Hee Lee,<sup>a</sup> Kausar Ali Khawaja,<sup>b</sup> Faiza Shoukat,<sup>b</sup> Yeasin Khan,<sup>a,c</sup> Do Hui Kim,<sup>d</sup> Shinuk Cho,<sup>\*d</sup> Bright Walker<sup>\*c</sup>, Jung Hwa Seo<sup>\*a</sup>

<sup>a</sup>Department of Physics, University of Seoul, Seoul, 02504, Republic of Korea

<sup>b</sup>Department of Physics, Dong-A University, Busan, 49315, Republic of Korea

<sup>c</sup>Department of Chemistry, Kyung Hee University, Seoul, 02447, Republic of Korea

<sup>e</sup>Department of Physics and Energy Harvest Storage Research Center (EHSRC), University of Ulsan, 44610, Ulsan, Republic of Korea

Table S1. pH in solution measured in pH meters and Litmus

|              | pH (Litmus) | pH (pH meter) |
|--------------|-------------|---------------|
| Ni:PSS       | 7           | 6.82          |
| Ni:PEDOT:PSS | 2~3         | 2.48          |
| PEDOT:PSS    | 1           | 2.04          |

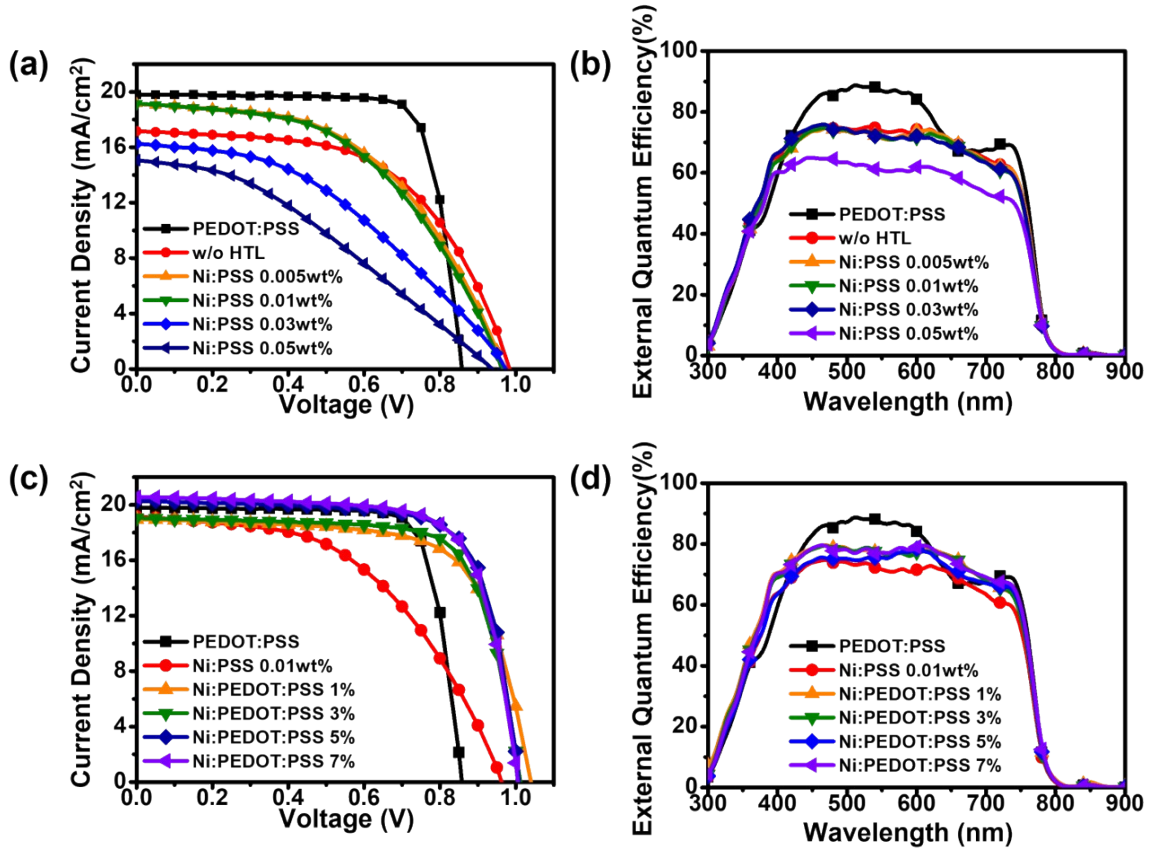

**Fig. S1.** Device characteristics of perovskite solar cells under illumination using Ni:PSS and Ni:PEDOT:PSS HTLs. (a),(c) J-V characteristics, (b),(d) External quantum efficiency

**Table S2.** Device characteristics of perovskite solar cells.

| Hole transport layer | Thickness (nm) | J <sub>sc</sub><br>(mA/cm <sup>2</sup> ) | V <sub>oc</sub><br>(V) | FF<br>(%)   | PCE<br>(%)   |
|----------------------|----------------|------------------------------------------|------------------------|-------------|--------------|
| PEDOT:PSS            | 25.06          | 19.09 ± 1.15                             | 0.85 ± 0.01            | 76.97 ± 3.2 | 12.48 ± 0.89 |
| Ni:PSS 0.005wt%      | -              | 16.55 ± 1.30                             | 0.95 ± 0.05            | 47.26 ± 3.6 | 7.44 ± 0.99  |
| Ni:PSS 0.01wt%       | 0.83           | 17.83 ± 0.74                             | 0.95 ± 0.04            | 54.49 ± 4.1 | 9.28 ± 0.25  |
| Ni:PSS 0.03wt%       | -              | 15.67 ± 1.04                             | 0.93 ± 0.06            | 36.84 ± 3.9 | 5.13 ± 0.59  |
| Ni:PSS 0.05wt%       | 1.79           | 14.41 ± 1.54                             | 0.85 ± 0.10            | 27.77 ± 4.4 | 3.40 ± 0.84  |
| Ni:PEDOT:PSS 1%      | 1.55           | 18.28 ± 1.02                             | 1.01 ± 0.01            | 64.91 ± 3.7 | 12.02 ± 1.08 |
| Ni:PEDOT:PSS 3%      | 2.21           | 19.14 ± 0.94                             | 1.02 ± 0.12            | 69.62 ± 2.3 | 13.59 ± 0.62 |
| Ni:PEDOT:PSS 5%      | 5.33           | 19.31 ± 0.98                             | 1.01 ± 0.01            | 72.10 ± 4.0 | 14.03 ± 0.79 |
| Ni:PEDOT:PSS 7%      | 12.34          | 19.55 ± 1.09                             | 0.99 ± 0.01            | 71.62 ± 3.3 | 13.91 ± 0.96 |

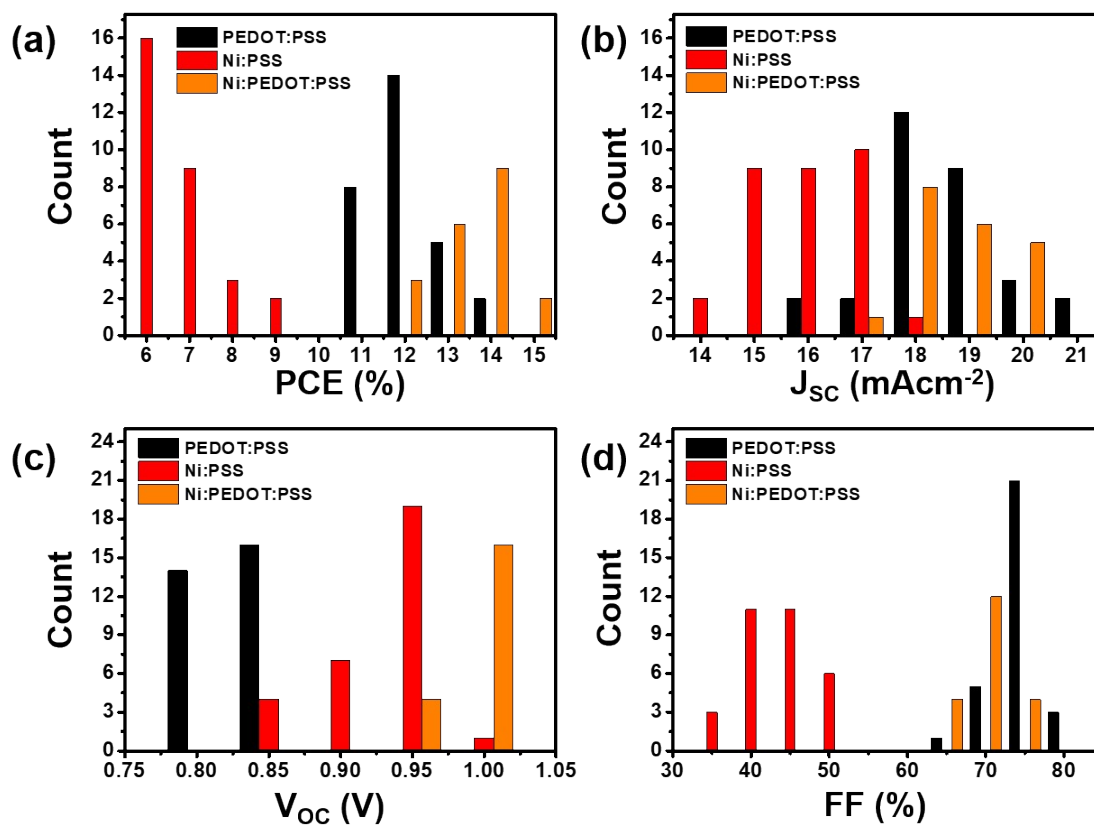

**Fig. S2.** Perovskite solar cell statistics. Histogram showing (a) distribution of PCE values, (b) distribution of  $J_{SC}$  values, (c) distribution of  $V_{OC}$  values and (d) distribution of FF values.

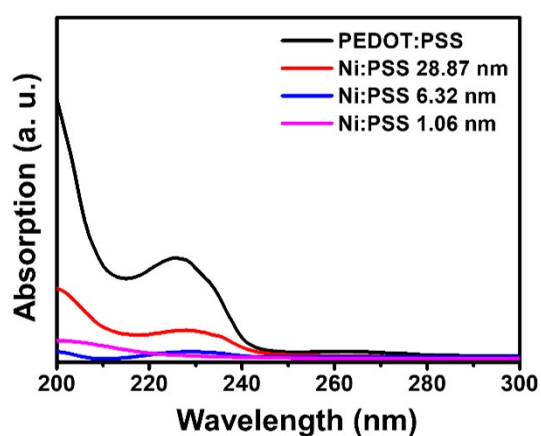

**Fig. S3.** UV-vis spectroscopy absorption spectrum of Ni:PSS and PEDOT:PSS

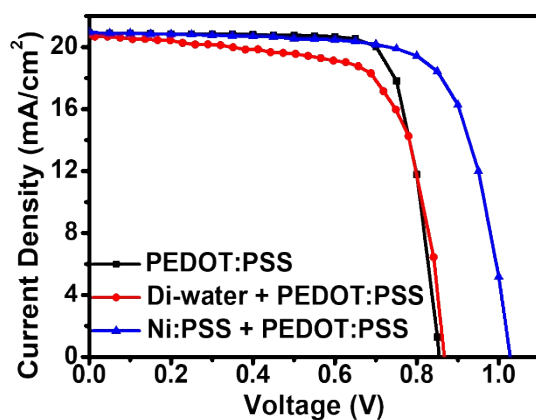

**Fig. S4.** J-V characteristics of perovskite solar cells under illumination using diluted PEDOT:PSS and Ni:PEDOT:PSS HTLs.

| Hole transport layer | $J_{sc}$<br>(mA/cm <sup>2</sup> ) | $V_{oc}$<br>(V) | FF<br>(%) | PCE<br>(%) |
|----------------------|-----------------------------------|-----------------|-----------|------------|
|                      |                                   |                 |           |            |

|                      |       |      |       |       |
|----------------------|-------|------|-------|-------|
| PEDOT:PSS            | 20.91 | 0.86 | 78.47 | 14.02 |
| Di-water + PEDOT:PSS | 21.10 | 0.76 | 76.67 | 13.58 |
| Ni:PSS + PEDOT:PSS   | 20.96 | 1.03 | 72.46 | 15.67 |

**Table S3.** Device characteristics of perovskite solar cells using diluted PEDOT:PSS and Ni:PEDOT:PSS .

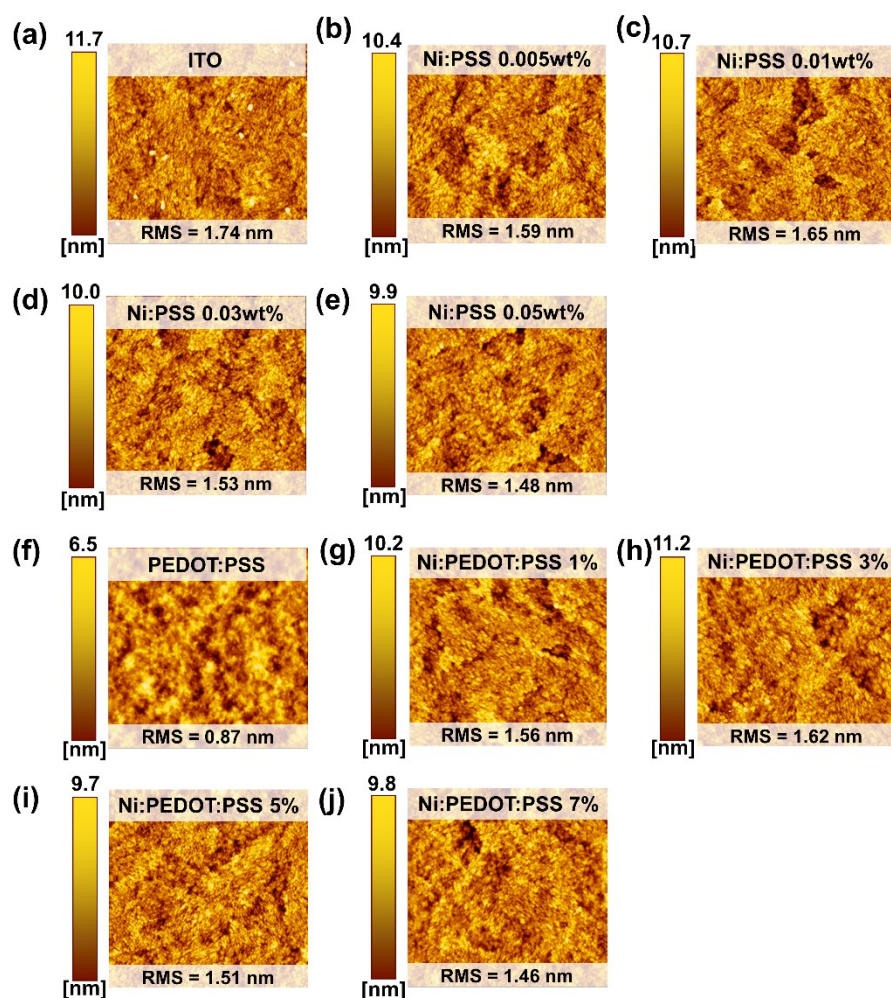

**Fig. S5.** AFM images of Ni:PSS and Ni:PEDOT:PSS films on ITO substrates. (a)-(e) different thickness of Ni:PSS, (f)-(j) Mixed Ni:PEDOT:PSS films prepared from solutions with different volumes of PEDOT:PSS.

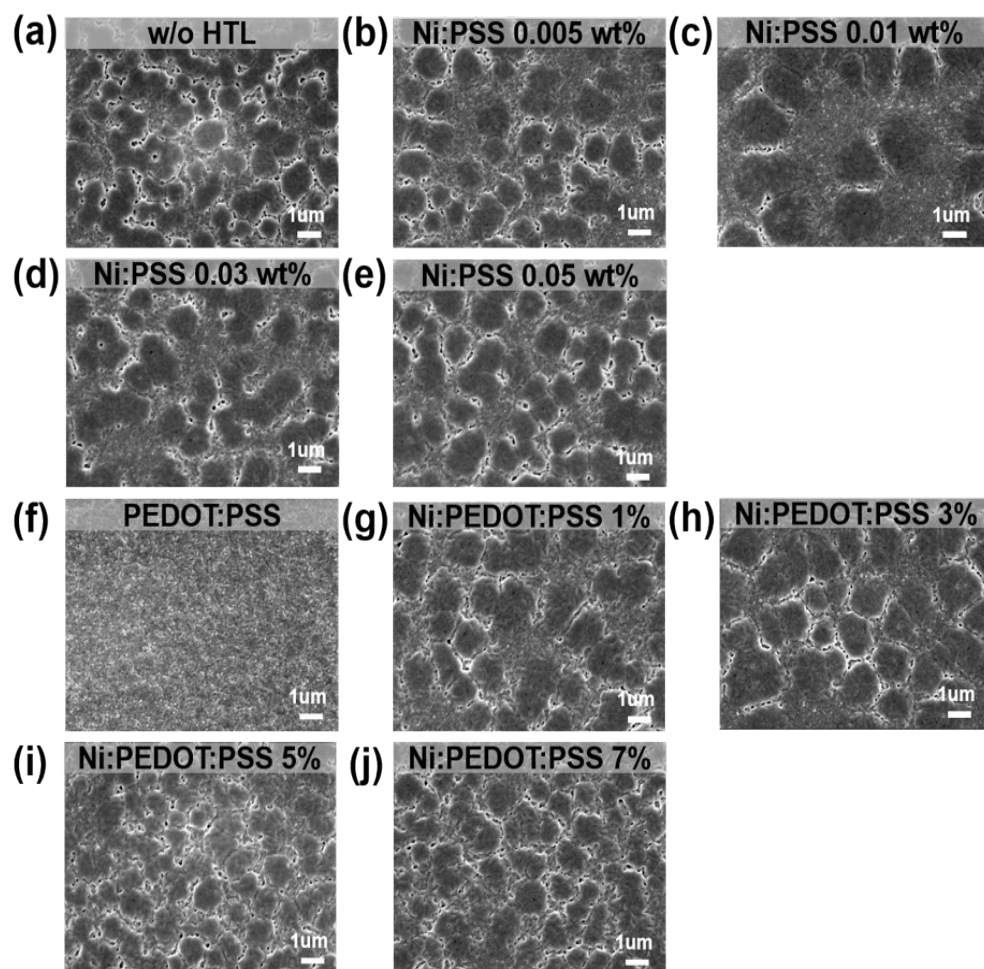

**Fig. S6.** SEM images of Ni:PSS and Ni:PEDOT:PSS films on ITO substrates. (a)-(e) different thickness of Ni:PSS, (f)-(j) Ni:PSS layer with different volumes of PEDOT:PSS

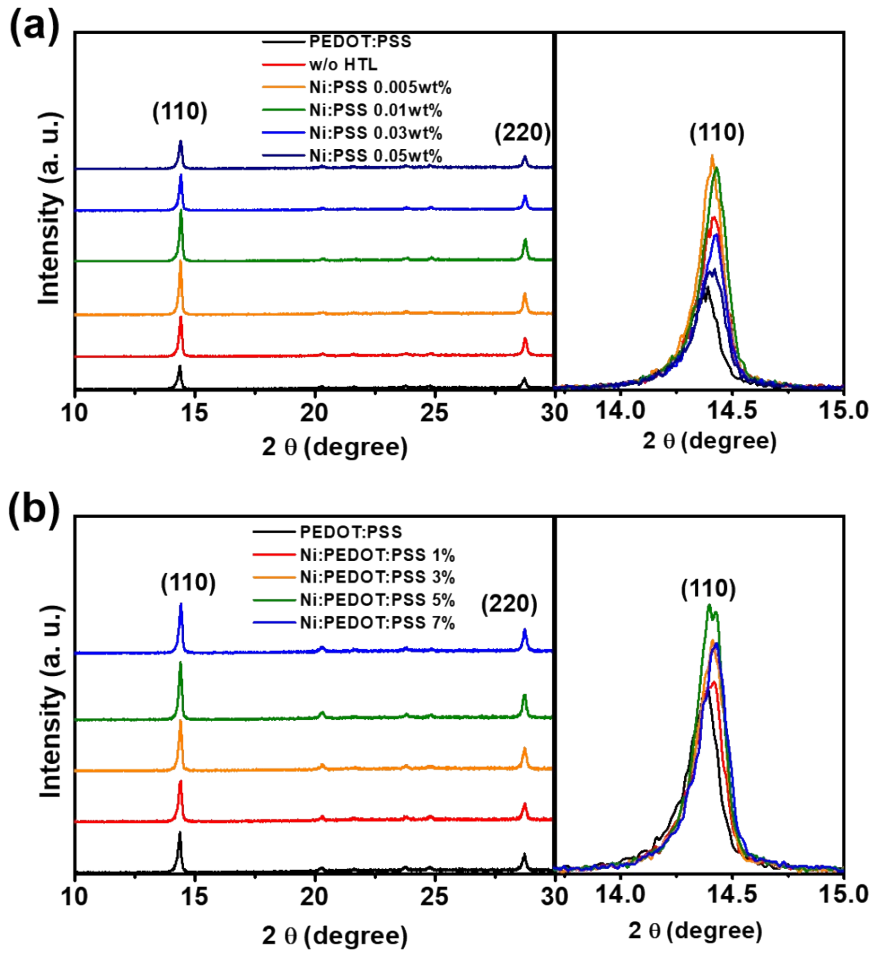

**Fig. S7.** X-ray diffraction patterns of different HTLs including (a) Ni:PSS films and (b) Ni:PSS films containing PEDOT:PSS as an additive.

**Table S4.** XRD Parameters of MAPbI<sub>3</sub> films deposited on variable HTLs.

| Hole transport layer | Peak Position<br>(2θ) | Intensity | FWHM   | d-spacing (Å) | Crystal Size<br>(Å) | Grain sizes <sup>1</sup><br>(μm) |
|----------------------|-----------------------|-----------|--------|---------------|---------------------|----------------------------------|
| PEDOT:PSS            | 14.39                 | 811.67    | 0.1732 | 6.155         | 46.259              | 0.404                            |
| w/o HTL              | 14.42                 | 1351.67   | 0.1553 | 6.142         | 51.596              | 1.026                            |
| Ni:PSS 0.005 wt%     | 14.41                 | 1841.67   | 0.1395 | 6.147         | 57.413              | 1.056                            |
| Ni:PSS 0.01 wt%      | 14.43                 | 1743.33   | 0.1458 | 6.138         | 54.954              | 1.359                            |
| Ni:PSS 0.03 wt%      | 14.43                 | 1218.33   | 0.1491 | 6.138         | 53.742              | 1.257                            |
| Ni:PSS 0.05 wt%      | 14.42                 | 948.33    | 0.1604 | 6.142         | 49.949              | 1.290                            |
| Ni:PEDOT:PSS 1%      | 14.42                 | 816.67    | 0.1673 | 6.142         | 47.909              | 1.378                            |
| Ni:PEDOT:PSS 3%      | 14.41                 | 1006.67   | 0.1566 | 6.147         | 51.173              | 1.296                            |
| Ni:PEDOT:PSS 5%      | 14.40                 | 1143.33   | 0.1475 | 6.151         | 54.323              | 1.078                            |



<sup>1</sup> Grain sizes were calculated from the SEM images in Fig. S5 using ImageJ software.

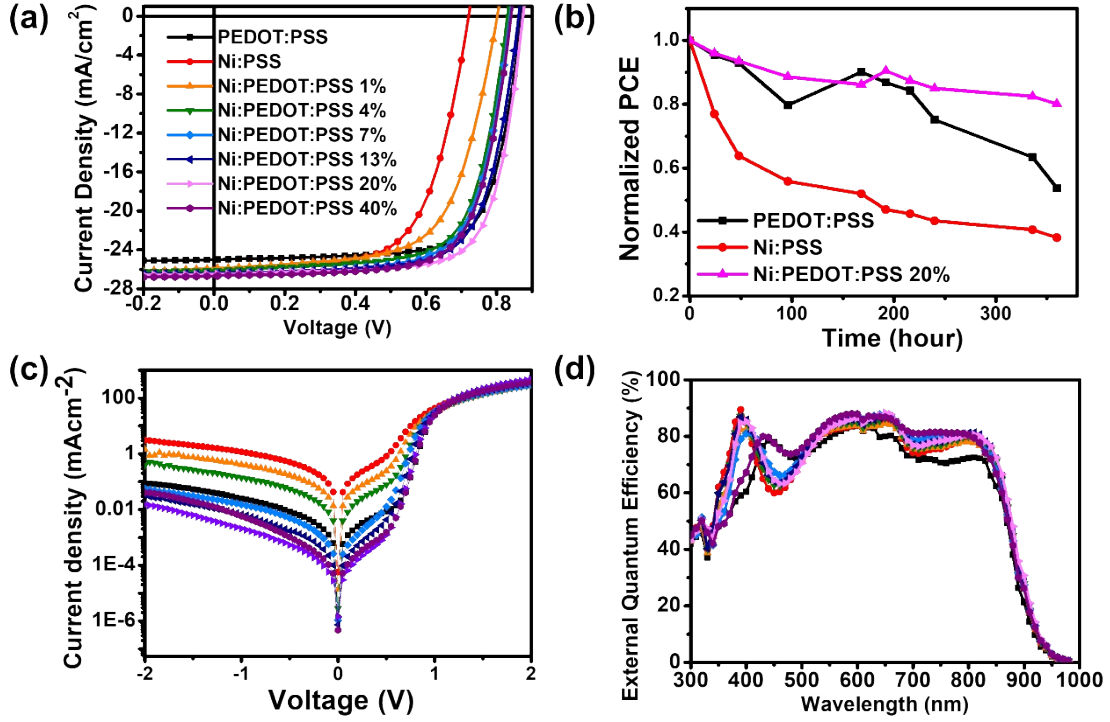

**Fig. S8.** Device characteristics of of organic (PM6:Y6) solar cells under illumination using Ni:PSS and Ni:PEDOT:PSS HTLs. (a) J-V characteristics, (b) device stability, (c) dark current density, (d) external quantum efficiency.

**Table S5.** Device characteristics of PM6:Y6 solar cells.

| Hole transport layer | Thickness (nm) | J <sub>SC</sub> (mA/cm <sup>2</sup> ) | J <sub>SC-EQE</sub> (mA/cm <sup>2</sup> ) | V <sub>OC</sub> (V) | FF (%)       | PCE (%)      |
|----------------------|----------------|---------------------------------------|-------------------------------------------|---------------------|--------------|--------------|
| PEDOT:PSS            | 25.06          | 25.37 ± 0.23                          | 24.35                                     | 0.86 ± 0.01         | 71.20 ± 1.00 | 15.60 ± 0.12 |
| Ni:PSS               | 1.79           | 25.95 ± 0.36                          | 25.35                                     | 0.69 ± 0.03         | 63.40 ± 1.40 | 11.20 ± 0.65 |
| Ni:PEDOT:PSS 1%      | 3.09           | 26.31 ± 0.26                          | 25.21                                     | 0.73 ± 0.05         | 64.50 ± 0.90 | 12.40 ± 0.75 |
| Ni:PEDOT:PSS 4%      | 4.49           | 26.04 ± 0.21                          | 25.67                                     | 0.82 ± 0.02         | 68.80 ± 0.90 | 14.60 ± 0.41 |
| Ni:PEDOT:PSS 7%      | 6.02           | 26.41 ± 0.28                          | 26.02                                     | 0.82 ± 0.01         | 69.40 ± 0.80 | 15.10 ± 0.44 |
| Ni:PEDOT:PSS 13%     | 10.09          | 26.49 ± 0.31                          | 25.99                                     | 0.85 ± 0.01         | 70.50 ± 0.40 | 15.80 ± 0.27 |
| Ni:PEDOT:PSS 20%     | 15.23          | 26.56 ± 0.31                          | 25.98                                     | 0.87 ± 0.01         | 71.80 ± 1.40 | 16.50 ± 0.25 |
| Ni:PEDOT:PSS 40%     | 21.69          | 26.39 ± 0.23                          | 26.23                                     | 0.86 ± 0.01         | 69.20 ± 1.50 | 15.60 ± 0.26 |

**Table S6.** The current-voltage response measured in the dark of PM6:Y6 solar cells.

| Hole transport layer | $R_{Sh}$<br>( $k\Omega$ ) | $R_s$<br>( $\Omega$ ) |
|----------------------|---------------------------|-----------------------|
| PEDOT:PSS            | 63.613                    | 0.183                 |
| Ni:PSS               | 1.047                     | 0.187                 |
| Ni:PEDOT:PSS 1%      | 3.074                     | 0.187                 |
| Ni:PEDOT:PSS 4%      | 9.944                     | 0.170                 |
| Ni:PEDOT:PSS 7%      | 116.788                   | 0.130                 |
| Ni:PEDOT:PSS 13%     | 294.143                   | 0.142                 |
| Ni:PEDOT:PSS 20%     | 1074.444                  | 0.142                 |
| Ni:PEDOT:PSS 40%     | 630.226                   | 0.149                 |

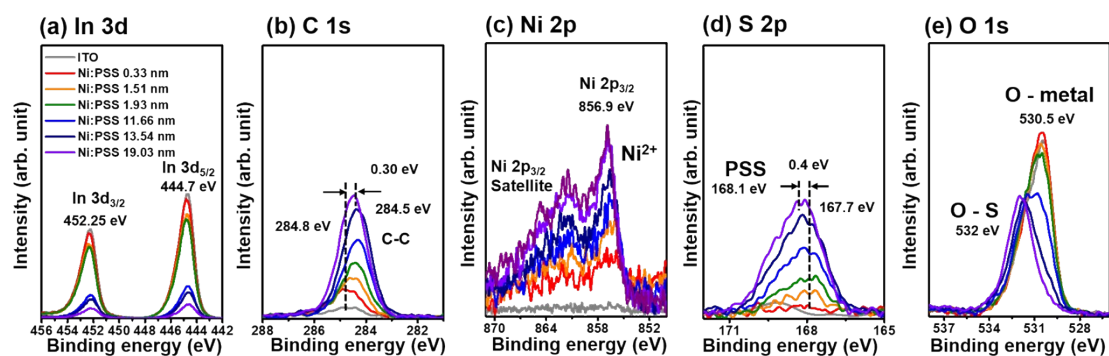

**Fig. S9.** XPS spectra of Ni:PSS films with variable thickness corresponding to (a) In 3d, (b) C 1s, (c) Ni 2p, (d) S 2p and (e) O 1s.

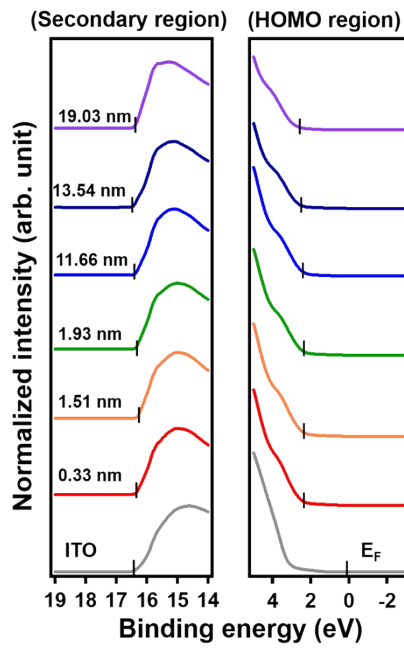

Fig. S10. UPS spectra of Ni:PSS films with variable thickness.

Table S7. Energy levels of Ni:PSS on ITO substrates derived from UPS data.

| Substrate  | Thickness (nm) | WF (eV) | $E_{\text{HOMO}}$ (eV) | EA (eV) | IP (eV) |
|------------|----------------|---------|------------------------|---------|---------|
|            | 0              | 4.74    | -                      | -       | -       |
| ITO/Ni:PSS | 0.33           | 4.85    | 2.37                   | 2.12    | 7.22    |
|            | 1.51           | 4.88    | 2.29                   | 2.07    | 7.17    |
|            | 1.93           | 4.83    | 2.37                   | 2.09    | 7.19    |
|            | 11.66          | 4.80    | 2.33                   | 2.04    | 7.14    |
|            | 13.54          | 4.73    | 2.48                   | 2.12    | 7.22    |
|            | 19.03          | 4.79    | 2.71                   | 2.40    | 7.50    |

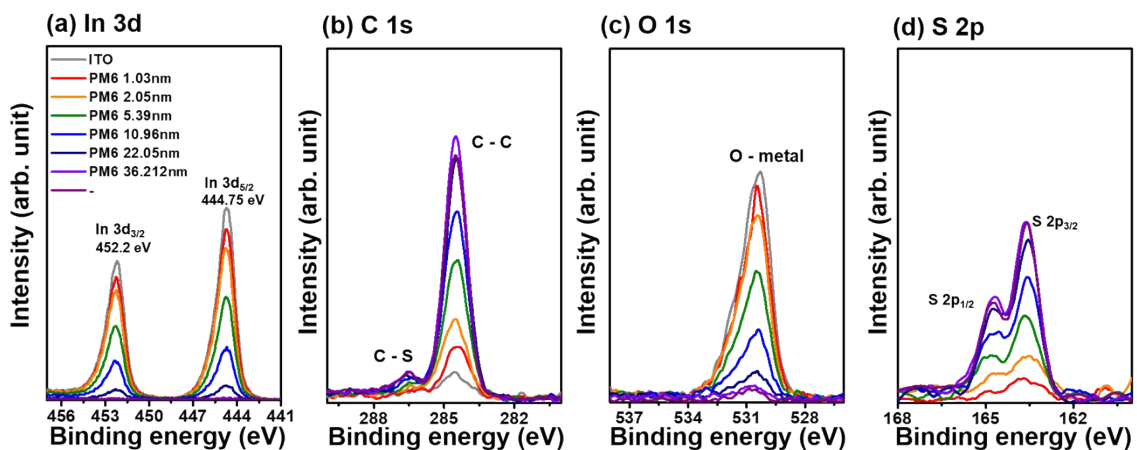

Fig. S11. XPS spectra of ITO/PM6 films with variable thickness corresponding to (a) In 3d, (b) C 1s, (c) O 1s and (d) S 2p.

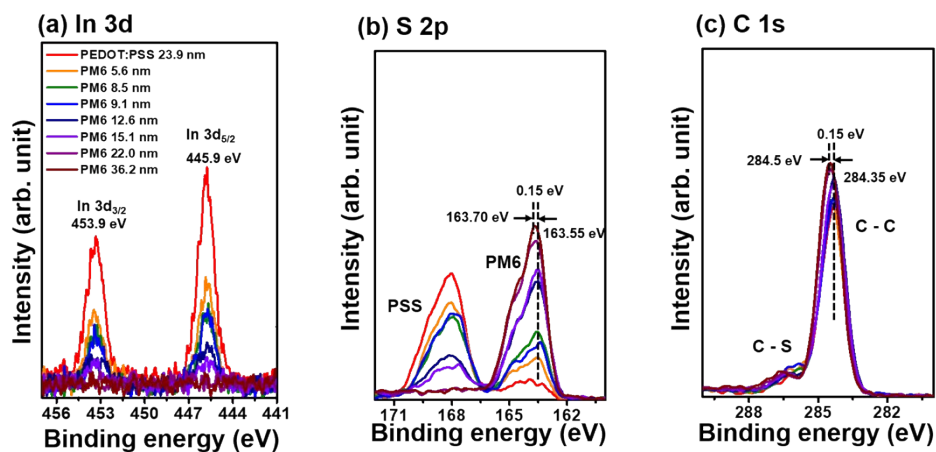

Fig. S12. XPS spectra of PEDOT:PSS/PM6 films with variable thickness corresponding to (a) In 3d, (b) S 2p and (c) C 1s.

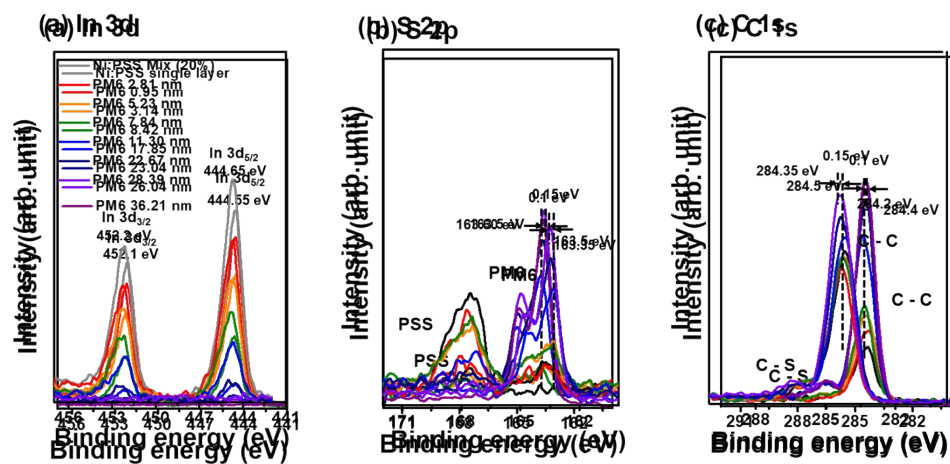

Fig. S13. XPS spectra of Ni/PEDOT:PSS/PM6 films with variable thickness corresponding to (a) In 3d, (b) S 2p and (c) C 1s.

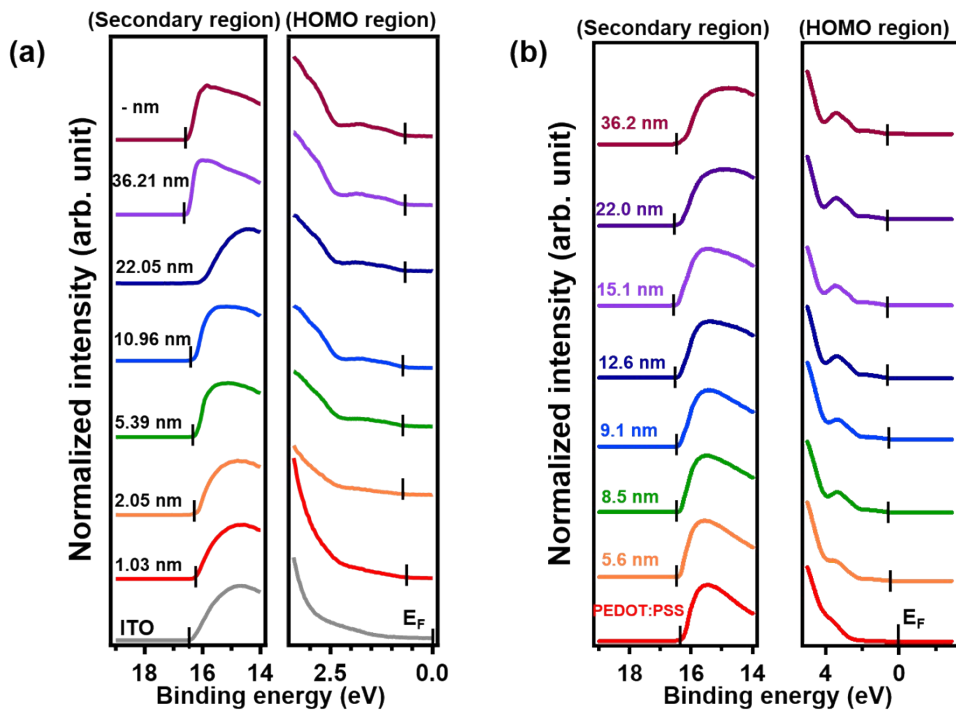

Fig. S15. UPS spectra of PM6 films with variable thickness corresponding to (a) ITO/PM6, and (b) PEDOT:PSS/PM6.

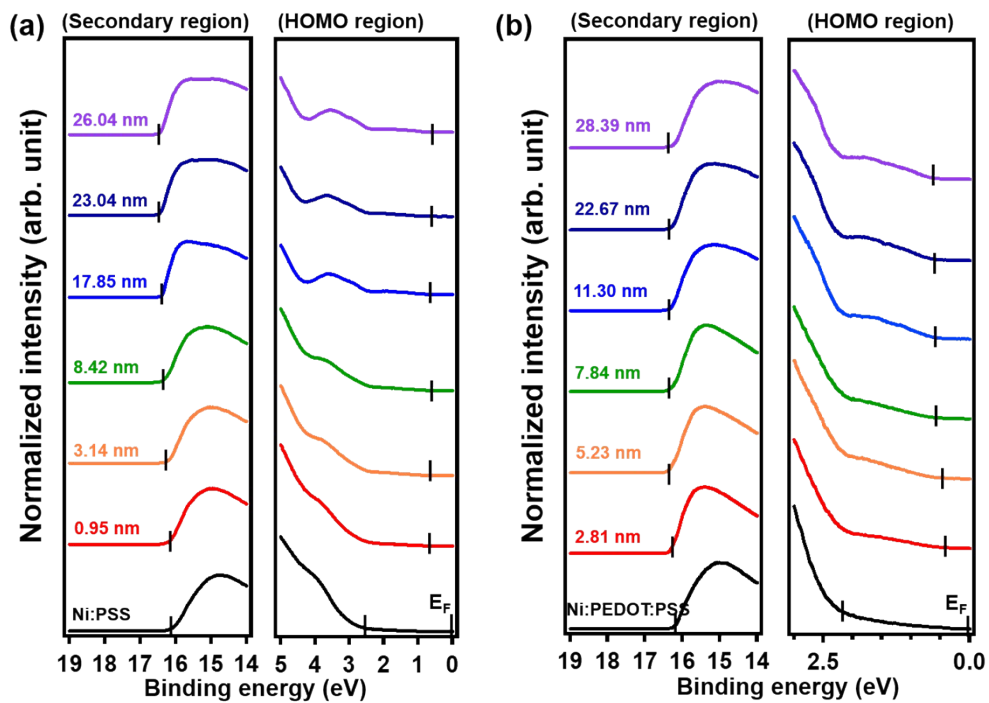

Fig. S16. UPS spectra of PM6 films with variable thickness corresponding to (a) Ni:PSS/PM6, and (b) Ni:PEDOT:PSS/PM6.

**Table S8.** Energy levels of PM6 deposited on various substrates derived from UPS data.

| Substrate        | Thickness (nm) | WF (eV) | E <sub>HOMO</sub> (eV) | EA (eV) | IP (eV) |
|------------------|----------------|---------|------------------------|---------|---------|
| ITO/PM6          | 0              | 4.61    | -                      | -       | -       |
|                  | 1.03           | 4.92    | 0.59                   | 3.62    | 5.51    |
|                  | 2.05           | 4.89    | 0.67                   | 3.67    | 5.56    |
|                  | 5.39           | 4.88    | 0.66                   | 3.66    | 5.55    |
|                  | 10.96          | 4.79    | 0.68                   | 3.58    | 5.47    |
|                  | 36.21          | 4.66    | 0.67                   | 3.45    | 5.34    |
|                  | -              | 4.67    | 0.67                   | 3.45    | 5.34    |
| PEDOT:PSS/PM6    | 0              | 4.98    | 2.59                   | 5.69    | 7.58    |
|                  | 5.6            | 4.83    | 0.36                   | 3.31    | 5.19    |
|                  | 8.5            | 4.84    | 0.41                   | 3.36    | 5.25    |
|                  | 9.1            | 4.81    | 0.43                   | 3.35    | 5.24    |
|                  | 12.6           | 4.78    | 0.51                   | 3.40    | 5.29    |
|                  | 15.1           | 4.75    | 0.53                   | 3.39    | 5.28    |
|                  | 22.0           | 4.74    | 0.53                   | 3.38    | 5.28    |
| 36.2             | 4.77           | 0.58    | 3.47                   | 5.36    |         |
| Ni:PSS/PM6       | 0              | 5.06    | 2.81                   | 5.98    | 7.87    |
|                  | 0.95           | 4.87    | 0.72                   | 3.70    | 5.59    |
|                  | 3.14           | 4.83    | 0.69                   | 3.63    | 5.52    |
|                  | 8.42           | 4.81    | 0.67                   | 3.58    | 5.47    |
|                  | 17.85          | 4.78    | 0.61                   | 3.51    | 5.39    |
|                  | 23.04          | 4.78    | 0.59                   | 3.49    | 5.38    |
|                  | 26.04          | 4.76    | 0.59                   | 3.47    | 5.36    |
| Ni:PEDOT:PSS/PM6 | 0              | 4.94    | 2.38                   | 2.22    | 7.32    |
|                  | 2.81           | 4.92    | 0.45                   | 3.48    | 5.37    |
|                  | 5.23           | 4.89    | 0.49                   | 3.50    | 5.39    |
|                  | 7.84           | 4.88    | 0.55                   | 3.54    | 5.43    |
|                  | 11.30          | 4.83    | 0.57                   | 3.51    | 5.40    |
|                  | 22.67          | 4.78    | 0.60                   | 3.49    | 5.38    |
|                  | 28.39          | 4.78    | 0.61                   | 3.50    | 5.39    |

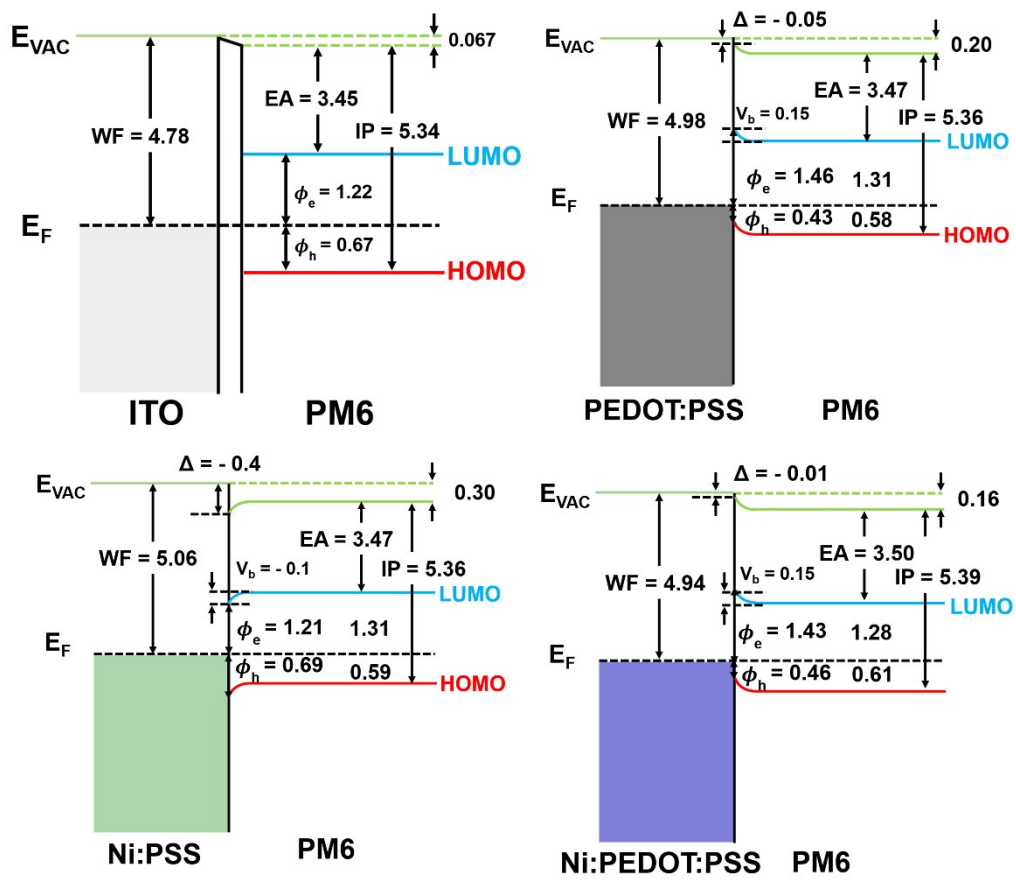

Fig. S17. Band diagram of PM6 depending on the substrate.
